# Supplementary material for: Durable keratin-based bilayered electrospun mats for wound closure
Source: Royal Society of Chemistry journal article supplement (doi:10.1039/c6tb00720a), 2016-01-01
Supplement: c6tb00720a1.pdf [file c6tb00720a1.pdf]

Supplementary Material (ESI) for Journal of Materials Chemistry B

**Durable keratin based bilayered electrospun mats for wound closure †**

Sivakumar Singaravelu<sup>a#</sup>, Giriprasath Ramanathan<sup>a#</sup>, Thangavelu Muthukumar<sup>b</sup>, M. D. Raja<sup>a</sup>, Naveen Nagiah<sup>c</sup>, Sitalakshmi Thyagarajan<sup>a</sup>, Adithan Aravinthan<sup>b</sup>, Gunasekaran. P<sup>d</sup>, Natarajan. T. S<sup>e</sup>, V. N. Geetha Selva Gangai<sup>f</sup>, Jong-hoon Kim<sup>\*b</sup>, Uma Tiruchirapalli Sivagnanam<sup>\*a</sup>

*a. Bioproducts Lab, CSIR-Central Leather Research Institute, Chennai-600020, Tamilnadu, India.*

*\*E-mail: suma67@gmail.com; Tel: + 91 44 24420709; Fax: +91 44 24911589*

*b. Department of Physiology, College of Veterinary Medicine, Chonbuk National University, 79 Gobong-ro, Iksan-city, Jeollabuk-Do 570-752, Republic of Korea. \*E-mail: jhkim1@jbnu.ac.kr*

*c. Department of Mechanical Engineering, University of Colorado, Boulder, USA.*

*d. Department of Virology, King Institute of Preventive Medicine and Research, Guindy, Chennai-600032, Tamilnadu, India.*

*e. Conducting Polymers Lab, Department of Physics, Indian Institute of Technology Madras, Chennai, India*

*f. Department of Biochemistry, Vikram Institute of Nursing and Paramedical Sciences, Mysore, Karnataka-570 002, India.*

† Electronic Supplementary Information (ESI) available: Tabel and Figure.

# Both have made equal contributions to this study

| <b>Contents:</b>      | <b>Page No.</b> |
|-----------------------|-----------------|
| Supplementary Table   | 02              |
| Supplementary Figures | 03-6            |

## Supplementary Table

Table S1. Tensile properties of electrospun nanofibrous scaffolds

| <b>Sample name</b> | <b>Mean Tensile Strength (MPa)</b> | <b>Mean Elongation At Break (%)</b> |
|--------------------|------------------------------------|-------------------------------------|
| <b>KC-PG</b>       | 25.49±1.06                         | 12.37±1.15                          |
| <b>KCD-PG</b>      | 24.82±0.57                         | 11.64±1.11                          |

## Supplementary Figures

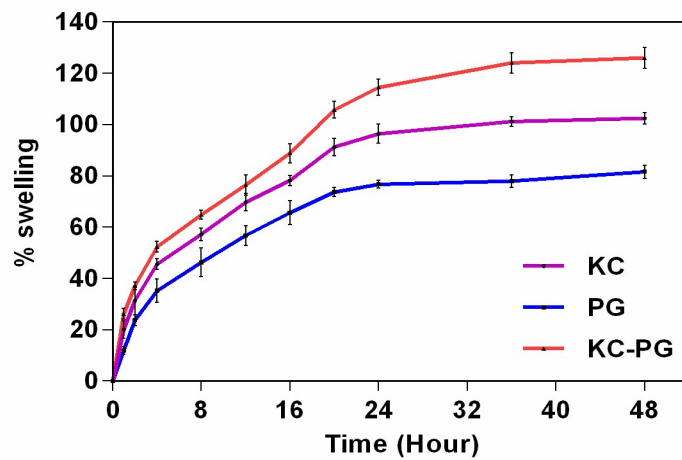

Figure S1 In vitro swelling behaviour of the nanofibrous scaffold

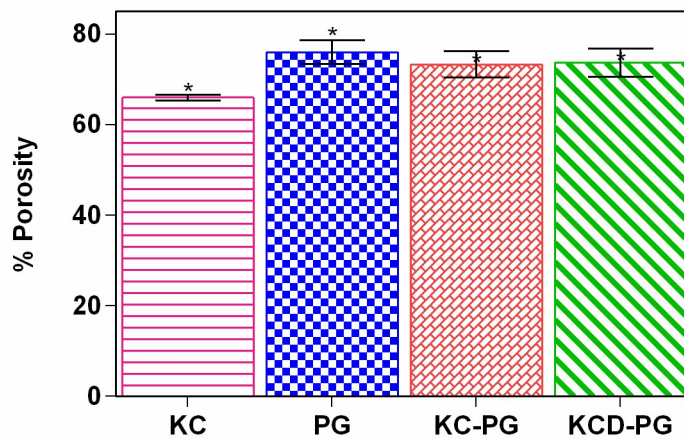

Figure S2 Porosity measurement of the nanofibrous scaffold (\*p < 0.05; data presented are mean  $\pm$ SD, n =3)

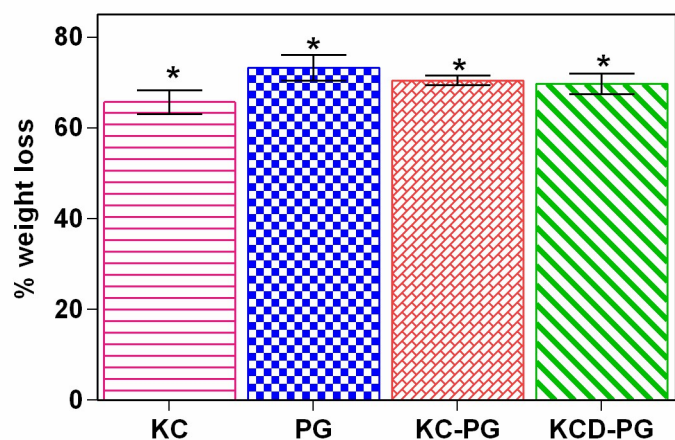

Figure S3 In vitro enzymatic stability of the nanofibrous scaffold scaffold (\*p < 0.05; data presented are mean  $\pm$ SD, n =3)

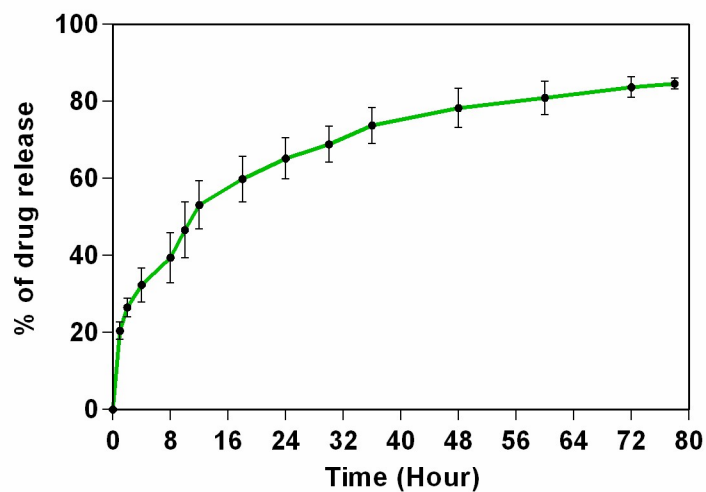

Figure S4 In vitro release study from the KCD-PG nanofibrous scaffold

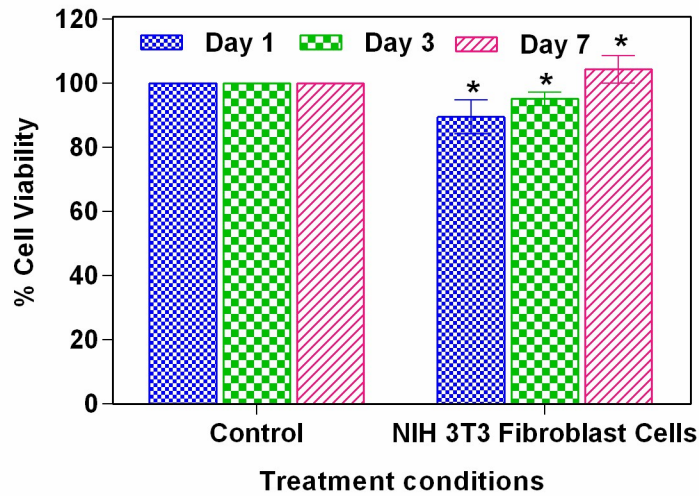

Figure S5 Figure 6 In vitro biocompatibility of NIH 3T3 fibroblast cell line over 1 day, 3 day and 7 day using MTT assay on the KCD-PG dual layered nanofibrous scaffold after 7 and 14 days. The data represented as the mean  $\pm$ SD, n =3 (\*P<0.05)

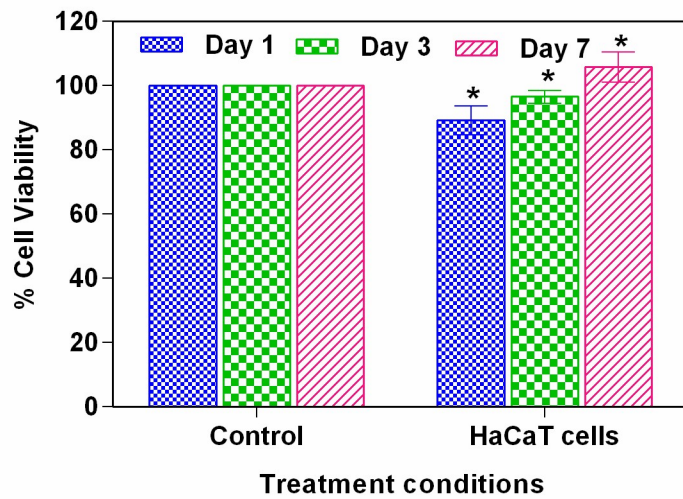

Figure S6 In vitro biocompatibility of Human (HaCaT) keratinocytes cell line over 1 day, 3 day and 7 day using MTT assay on the KCD-PG dual layered nanofibrous scaffold. The data are represented as the means  $\pm$  standard deviation; n = 3 (\*P < 0.05).

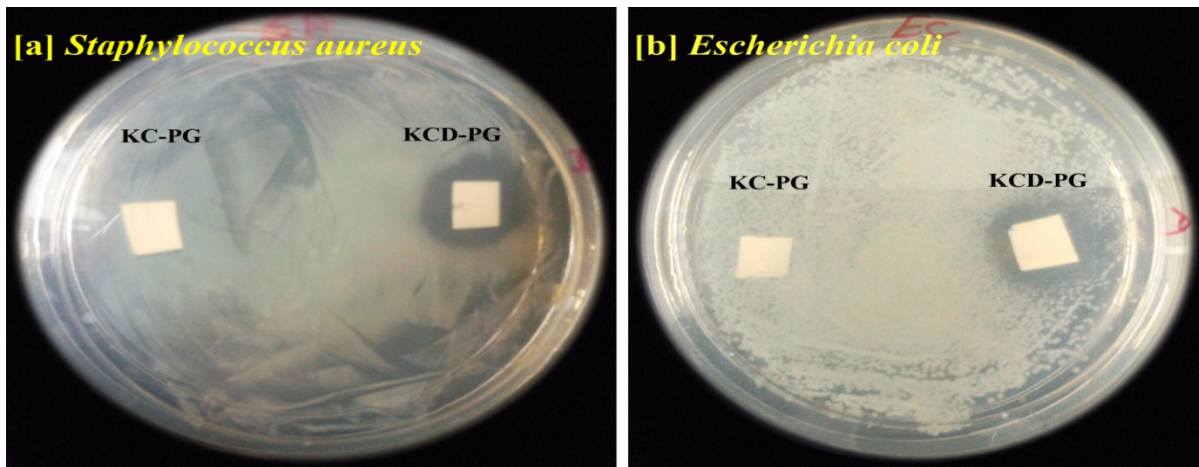

Figure S7 Antibacterial activities of the dual layered nanofibrous scaffold (a) *Staphylococcus aureus* and (b) *Escherichia coli*

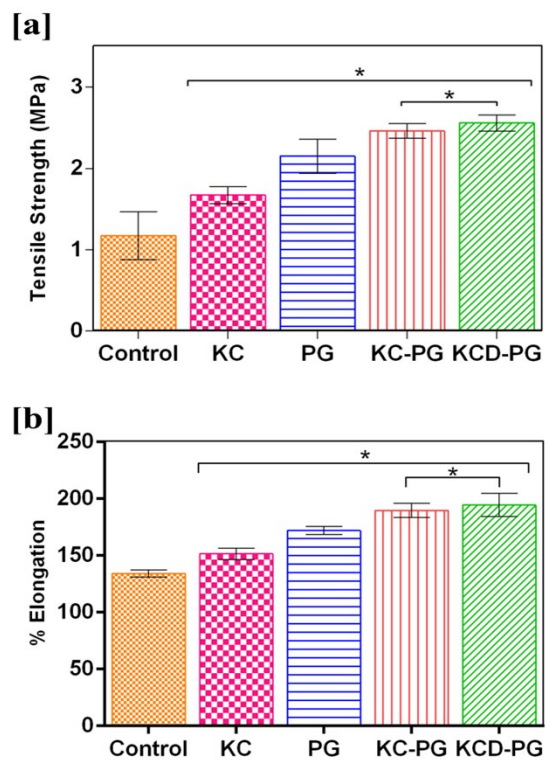

Figure S8 Tensile strength and elongation values of excised healed wound tissues of control and treated groups. Values are expressed as mean  $\pm$  SD and the level of significance is expressed as \* corresponding to  $p < 0.05$ , respectively compared with the control group.
